# Supplementary material for: A cationic copolymer as a cocatalyst for a peroxidase-mimicking heme-DNAzyme
Source: Royal Society of Chemistry journal article supplement (doi:10.1039/d1bm00949d), 2021-01-01
Supplement: d1bm00949d1.pdf [file d1bm00949d1.pdf]

**Electronic Supplementary Material (ESI)**

**A Cationic Copolymer as a Cocatalyst for  
a Peroxidase-Mimicking Heme-DNAzyme**

Haruka Araki,<sup>a</sup> Shota Hagiwara,<sup>a</sup> Ryosuke Shinomiya,<sup>a</sup> Atsuya Momotake,<sup>a</sup>  
Hiroaki Kotani,<sup>a</sup> Takahiko Kojima,<sup>a</sup> Takuro Ochiai,<sup>b</sup> Naohiko Shimada,<sup>b</sup>  
Atsushi Maruyama,<sup>b</sup> and Yasuhiko Yamamoto<sup>\*a,c</sup>

<sup>a</sup> *Department of Chemistry, University of Tsukuba, Tsukuba 305-8571, Japan*

<sup>b</sup> *School of Life Science and Technology, Tokyo Institute of Technology, 4259  
B-57 Nagatsuta-cho, Midori-ku, Yokohama, Kanagawa 226-8501, Japan*

<sup>c</sup> *Tsukuba Research Center for Energy Materials Science (TREMS),  
University of Tsukuba, Tsukuba 305-8571, Japan*

\* Corresponding author: Yasuhiko Yamamoto

Phone/Fax: +81-29-853-6521, E-mail: [yamamoto@chem.tsukuba.ac.jp](mailto:yamamoto@chem.tsukuba.ac.jp)

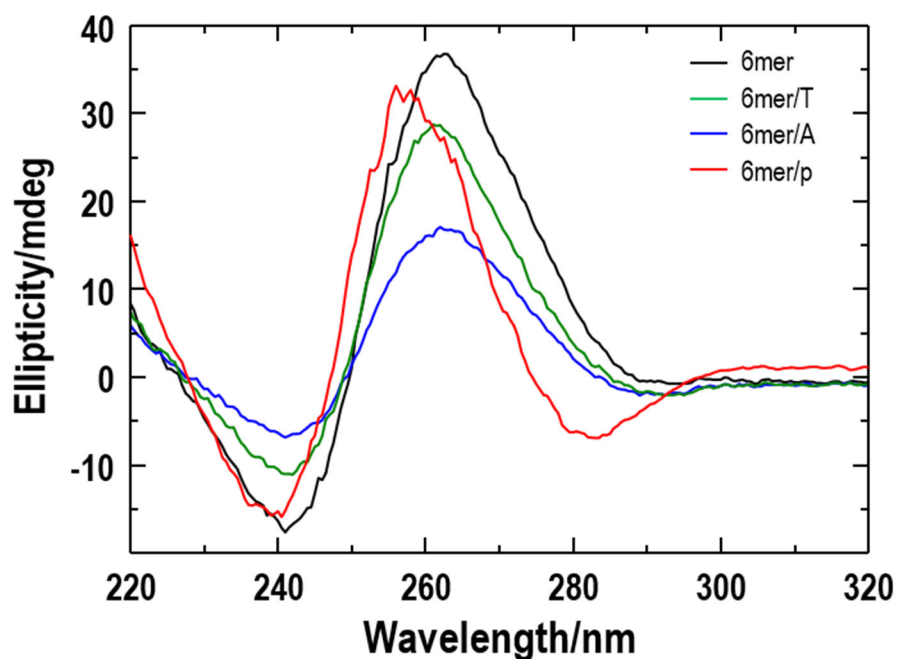

**Fig. S1.** CD spectra of parallel-stranded tetrameric G-quadruplex DNAs, 6mer (black), 6mer/T (green), and 6mer/A (blue), formed from 5.0  $\mu\text{M}$  d(TTAGGG), d(TTAGGG/T), and d(TTAGGGA), respectively, and that, 6mer/p (red), formed from 10  $\mu\text{M}$  d(TTAGGGp) in 50 mM potassium phosphate buffer, pH 6.80, and 50 mM KCl at 25  $^{\circ}\text{C}$ . The negative and positive Cotton effects at  $\sim 240$  and  $\sim 260$  nm, respectively, are CD spectral signatures for formation of parallel-stranded G-quadruplex DNA (R. Del Villar-Guerra, R. D. Gray, J. B. Chaires *Curr. Protoc. Nucleic Acid Chem.*, 2017, **2**, 1-17).

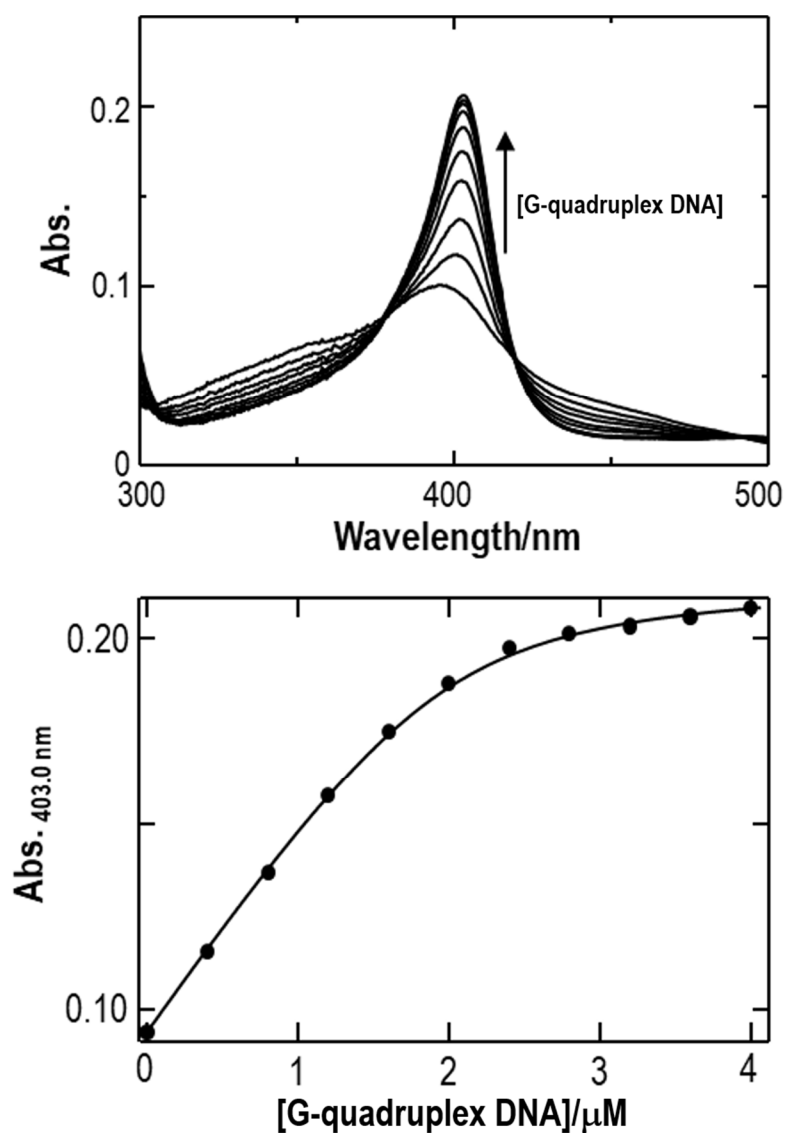

**Fig. S2** Soret absorption, 300-500 nm, of a parallel-stranded tetrameric G-quadruplex DNA (6mer), 0 – 6  $\mu\text{M}$ , titrated against 2.0  $\mu\text{M}$  heme( $\text{Fe}^{3+}$ ) in 300 mM KCl and 50 mM potassium phosphate buffer, pH 6.80, together with 0.08 w/v% Triton X-100 and 0.5 v/v% dimethyl sulfoxide, at 25  $^{\circ}\text{C}$  (top). A heme binding constant ( $K_a$ ) of  $6.5 \pm 0.7 \mu\text{M}^{-1}$  was obtained for the heme( $\text{Fe}^{3+}$ )-6mer complex (bottom).

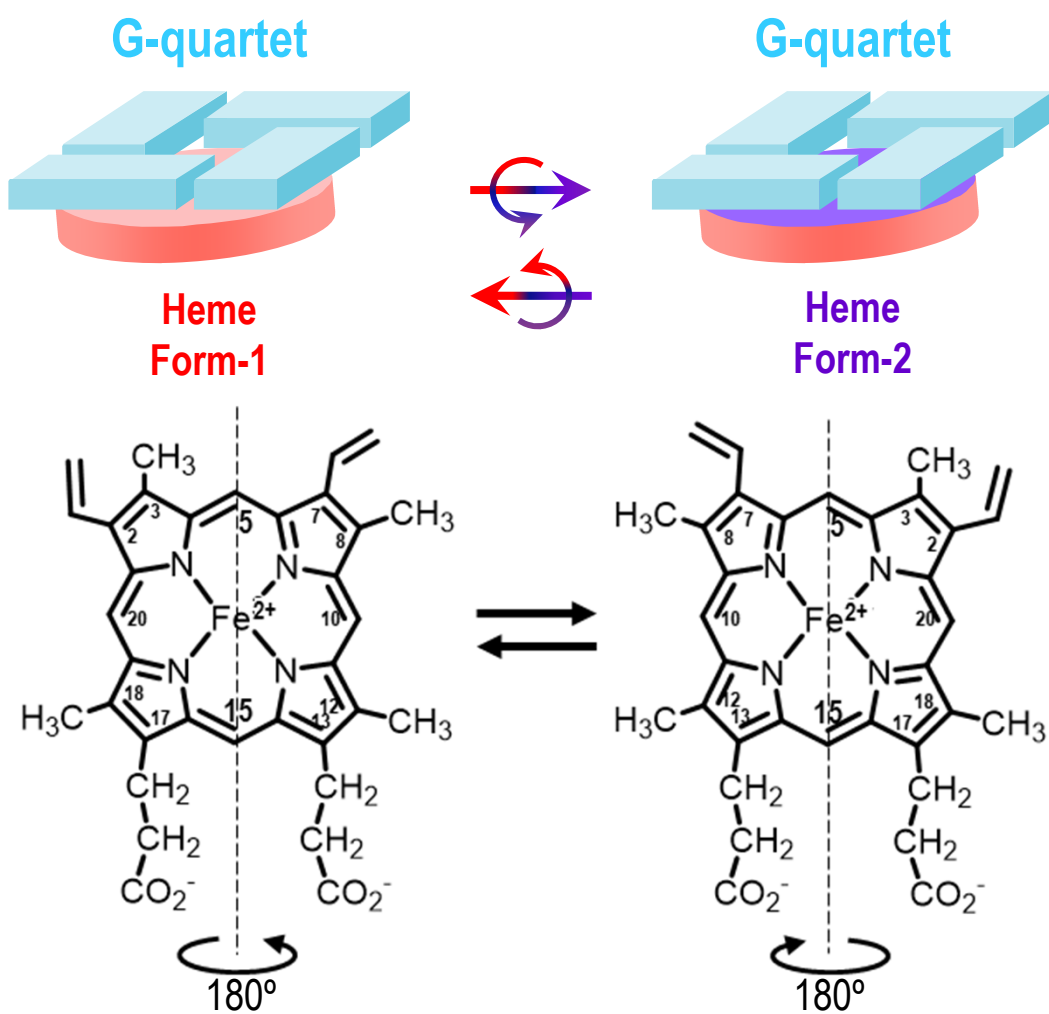

**Figure S3.** Two different orientations of heme( $\text{Fe}^{2+}$ ) with respect to a G-quartet. These orientations can be interconverted through  $180^\circ$  rotation of heme( $\text{Fe}^{2+}$ ) around the *pseudo- $C_2$*  axis passing through the *meso* 5- and 15-H hydrogens.

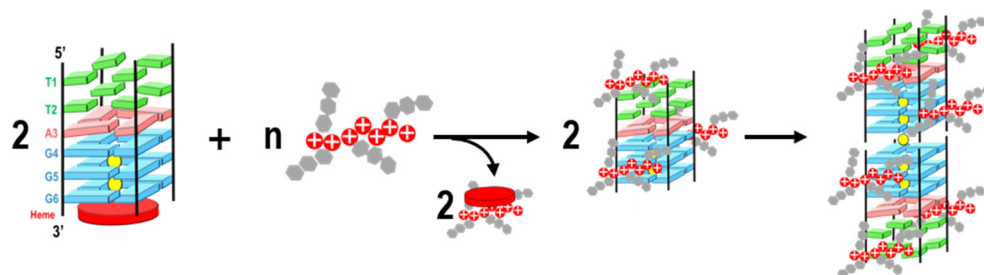

**Fig. S4** Schematic representation of dimerization of the 6mer produced through the detachment of heme from the heme-6mer complex due to the polymer. The dimerization occurs through end-to-end stacking of the 3'-terminal G-quartets (Y. Kato, T. Ohyama, H. Mita, Y. Yamamoto, *J. Am. Chem. Soc.* 2005, **127**, 9980–9981).

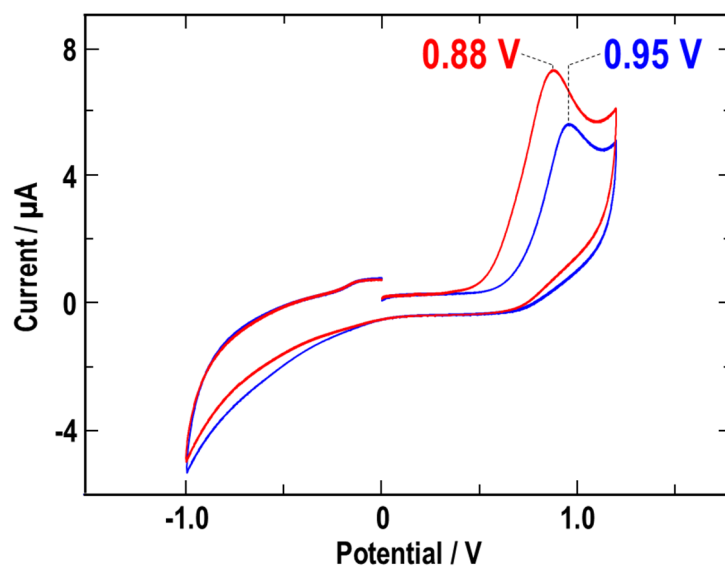

**Fig. S5.** Cyclic voltammograms of 50 mM Amplex Red aqueous solutions containing 50 mM potassium phosphate buffer, pH 6.80, in the absence (blue) and presence of PLL-g-Dex at  $N/P = 3.6$  (red), at room temperature. The oxidation potentials of 0.95 and 0.88 V (vs. SCE) were obtained for Amplex Red in the absence and presence of the polymer, respectively. The measurements were made using a BAS ALS-619EZ electrochemical analyzer with a boron-doped diamond electrode as a working electrode, a platinum wire as a counter electrode, and saturated calomel electrode (SCE) as a reference electrode.

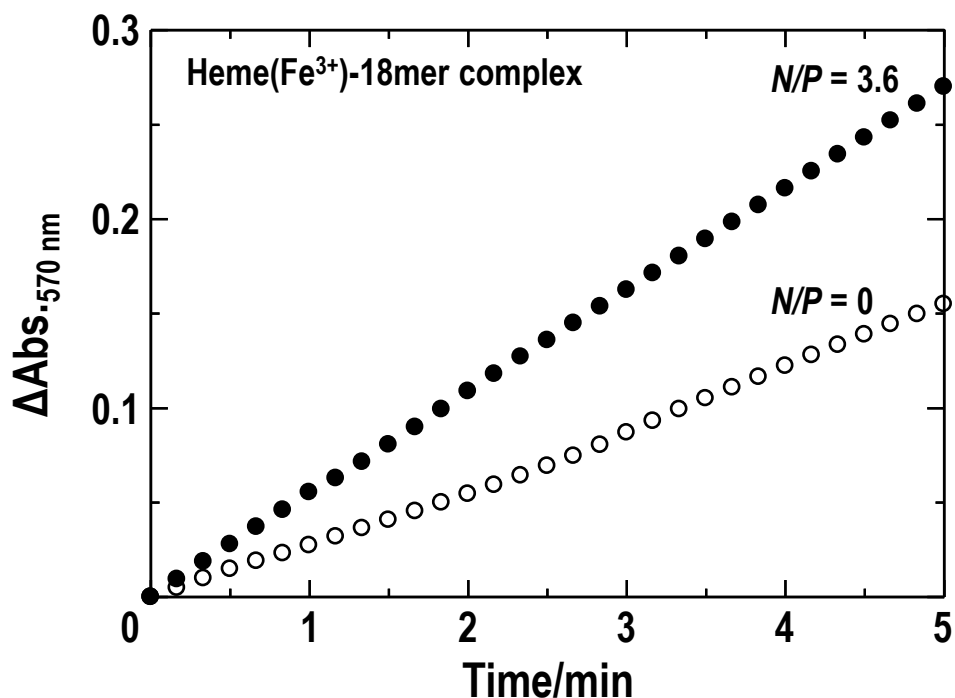

**Fig. S6.** Time-evolution of 570-nm absorbance due to Resorufin produced on the oxidation of Amplex Red by a complex between heme( $\text{Fe}^{3+}$ ) and an all parallel-stranded monomeric G-quadruplex DNA of non-standard base inosine(I)-containing sequence d(TAGGGTGGGTTGGGTGIG) (18mer), i.e., the heme( $\text{Fe}^{3+}$ )-18mer complex in the absence ( $\circ$ ) and presence of PLL-g-Dex at  $N/P = 3.6$  ( $\bullet$ ). All samples contained  $0.5 \mu\text{M}$  heme( $\text{Fe}^{3+}$ ),  $20 \mu\text{M}$  DNA,  $50 \mu\text{M}$  Amplex Red, and  $200 \mu\text{M}$   $\text{H}_2\text{O}_2$  in  $50 \text{ mM}$   $\text{K}^+$  phosphate buffer, pH 6.80, at  $25 \text{ }^\circ\text{C}$ . Initial slopes ( $R_0$ ) of  $0.57 \pm 0.06$  and  $1.00 \pm 0.10 \mu\text{M}/\text{min}$  were obtained for the complex in the absence and presence of the polymer, respectively.

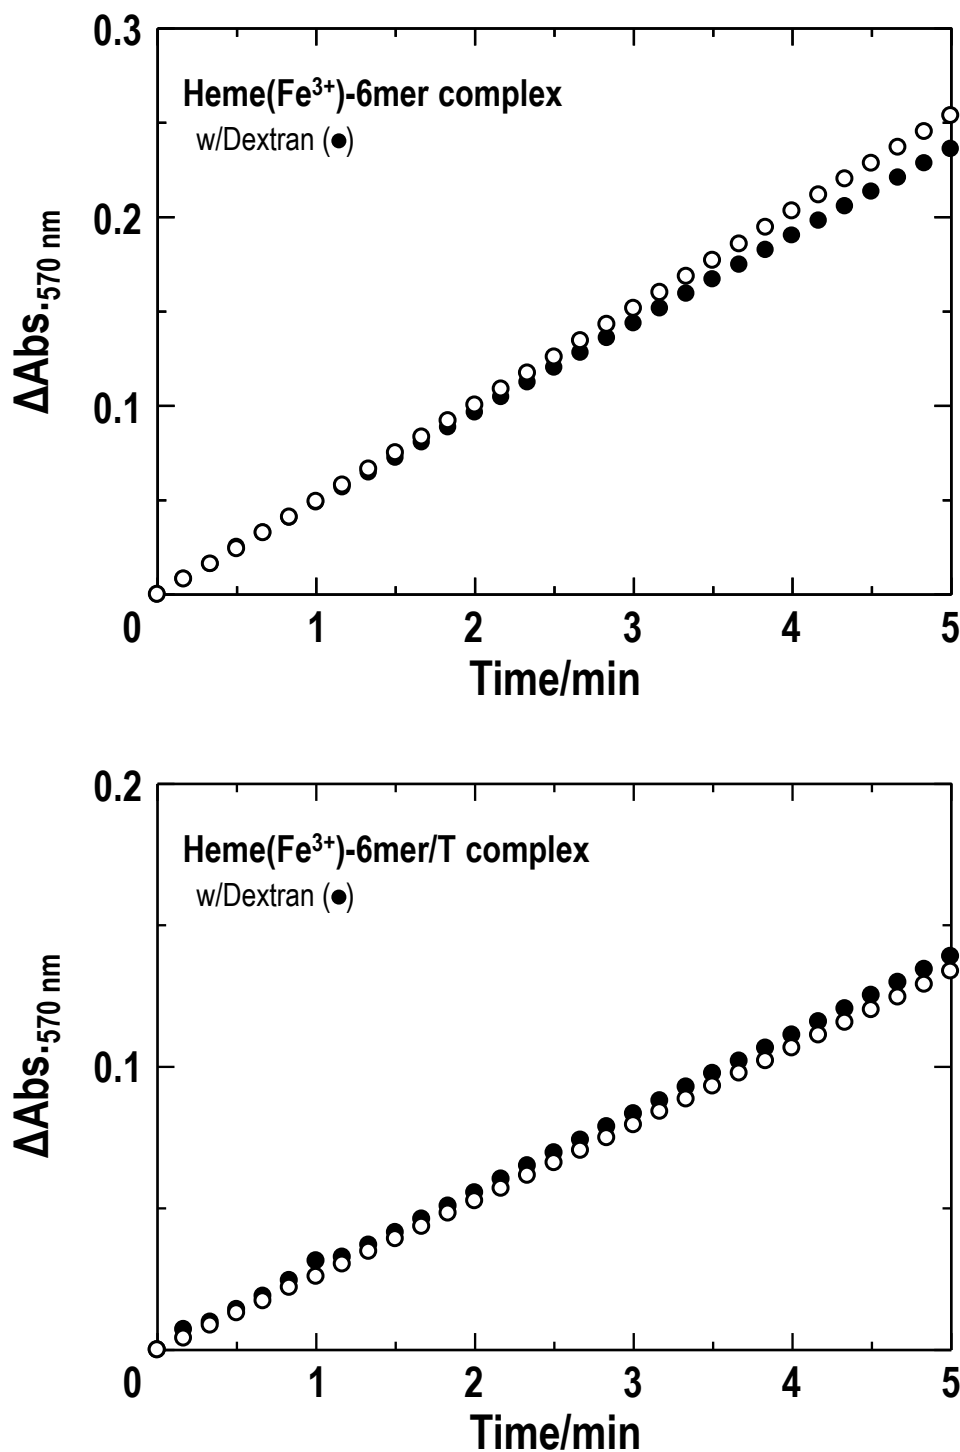

**Fig. S7.** Time-evolution of 570-nm absorbance due to Resorufin produced on the oxidation of Amplex Red by the heme(Fe<sup>3+</sup>)-6mer (top) and heme(Fe<sup>3+</sup>)-6mer/T complexes (bottom) in the absence (○) and presence of the dextran used to prepare PLL-g-Dex (●). All samples contained 0.5 μM heme(Fe<sup>3+</sup>), 20 μM DNA, 50 μM Amplex Red, and 200 μM H<sub>2</sub>O<sub>2</sub> in 50 mM K<sup>+</sup> phosphate buffer, pH 6.80, at 25 °C. The dextran in amount equal to the weight of the dextran moiety of PLL-g-Dex at N/P = 3.6 was added to the reaction mixture. Initial slopes ( $R_0$ ) of  $0.94 \pm 0.09$  and  $0.88 \pm 0.09$  μM/min were obtained for the heme(Fe<sup>3+</sup>)-6mer complex in the absence and presence of the dextran, respectively, and those of  $0.50 \pm 0.05$  and  $0.51 \pm 0.05$  μM/min for the heme(Fe<sup>3+</sup>)-6mer/T one in the absence and presence of the dextran, respectively.



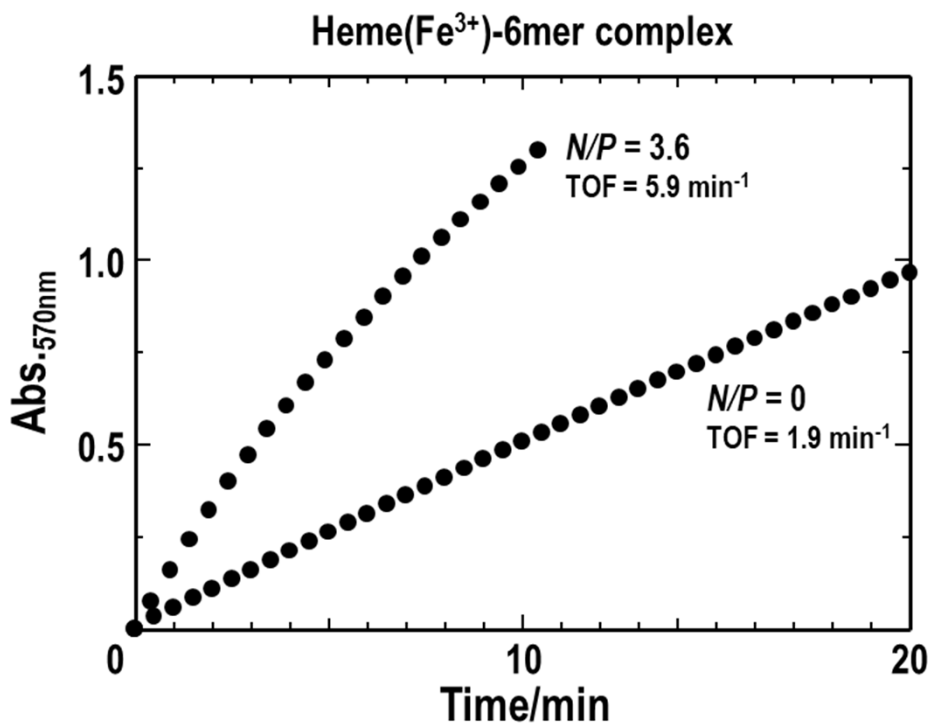

**Fig. S8.** Time-evolution of 570-nm absorbance due to Resorufin ( $\epsilon_{570} = 5.4 \times 10^4 \text{ M}^{-1} \text{ cm}^{-1}$ ) produced on the oxidation of Amplex Red by the heme( $\text{Fe}^{3+}$ )-6mer complex in the absence (top) and presence of PLL-g-Dex at  $N/P = 3.6$  (bottom). All samples contained  $0.5 \mu\text{M}$  heme( $\text{Fe}^{3+}$ ),  $20 \mu\text{M}$  DNA,  $50 \mu\text{M}$  Amplex Red, and  $200 \mu\text{M}$   $\text{H}_2\text{O}_2$  in  $50 \text{ mM}$   $\text{K}^+$  phosphate buffer, pH 6.80, at  $25 \text{ }^\circ\text{C}$ . The turnover frequencies (TOFs) of  $1.9$  and  $5.9 \text{ min}^{-1}$  were obtained for the complex in the absence and presence of the polymer, respectively.

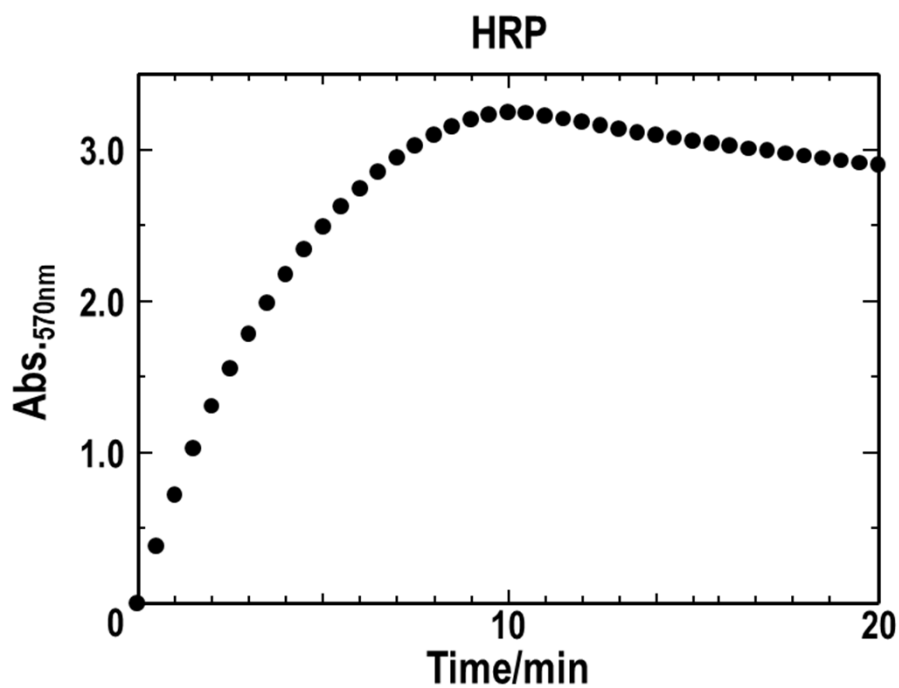

**Fig. S9.** Time-evolution of 570-nm absorbance due to Resorufin ( $\epsilon_{570} = 5.4 \times 10^4 \text{ M}^{-1} \text{ cm}^{-1}$ ) produced on the oxidation of Amplex Red by HRP. The reaction mixture contained 1 nM HRP, 50  $\mu\text{M}$  Amplex Red, and 200  $\mu\text{M}$   $\text{H}_2\text{O}_2$  in 50 mM  $\text{K}^+$  phosphate buffer, pH 6.80, at 25  $^\circ\text{C}$ . The turnover frequency (TOF) of  $1.1 \times 10^4 \text{ min}^{-1}$  was obtained.
